# Supplementary material for: β-Sialon nanowires, nanobelts and hierarchical nanostructures: morphology control, growth mechanism and cathodoluminescence properties
Source: Royal Society of Chemistry journal article supplement (doi:10.1039/c3nr03896c), 2013-10-07
Supplement: c3nr03896c.pdf [file c3nr03896c.pdf]

## Electronic Supplementary Information

### $\beta$ -Sialon Nanowires, Nanobelts and Hierarchical Nanostructures: Morphology Control, Growth Mechanism and Cathodoluminescence Properties

Juntong Huang,<sup>a,b</sup> Zhaohui Huang,\*<sup>a</sup> Yangai Liu,<sup>a</sup> Minghao Fang,<sup>a</sup> Kai Chen,<sup>a</sup> Yaoting Huang,<sup>c</sup>

Saifang Huang,<sup>a</sup> Haipeng Ji,<sup>a</sup> Jingzhou Yang,<sup>a</sup> Xiaowen Wu,<sup>a</sup> Shaowei Zhang\*<sup>b</sup>

<sup>a</sup> School of Materials Science and Technology, China University of Geosciences (Beijing), Beijing 100083, P. R. China

<sup>b</sup> College of Engineering, Mathematics and Physical Sciences, University of Exeter, Exeter EX4 4QF, UK

<sup>c</sup> School of Science, Beijing University of Posts and Telecommunication, Beijing 100876, P. R. China

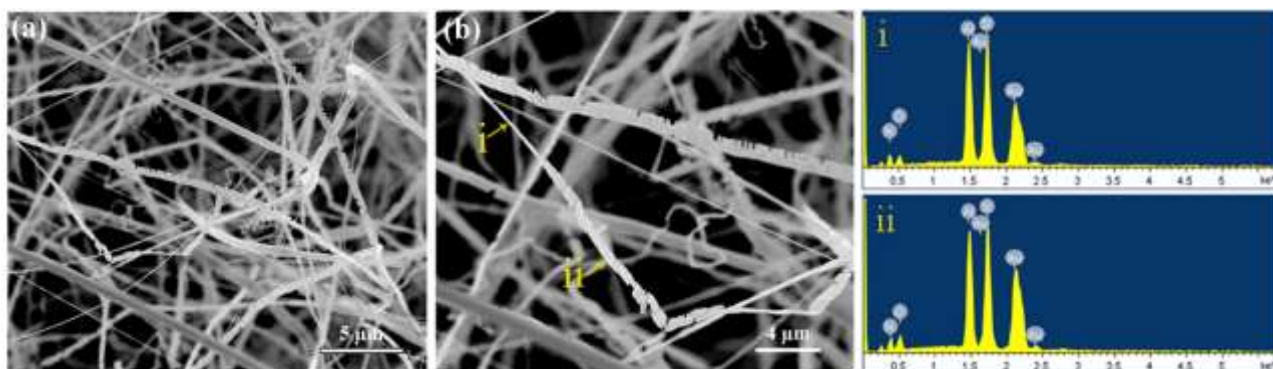

**Fig. S1** Low magnification SEM image and EDS patterns of the products prepared with a combined firing schedule, *i.e.*, initially at 1450 °C for 1 h and then at a higher temperature of 1500 °C for 2 h, without using a catalyst.
